# Supplementary material for: Does More Data Always Help? Input Configuration Impacts on LSTM-based Water Level Prediction
Source: Research Square preprint supplement (doi:10.21203/rs.3.rs-7597625/v1), 2025-10-07
Supplement: Supplementary file 1 [file bcb0c05c355238848a672bc0.docx]

# Performance Evaluation of Input Scenarios for LSTM-based Water Stage Forecasting: A Case Study in Pajiang River Detention Basin

| 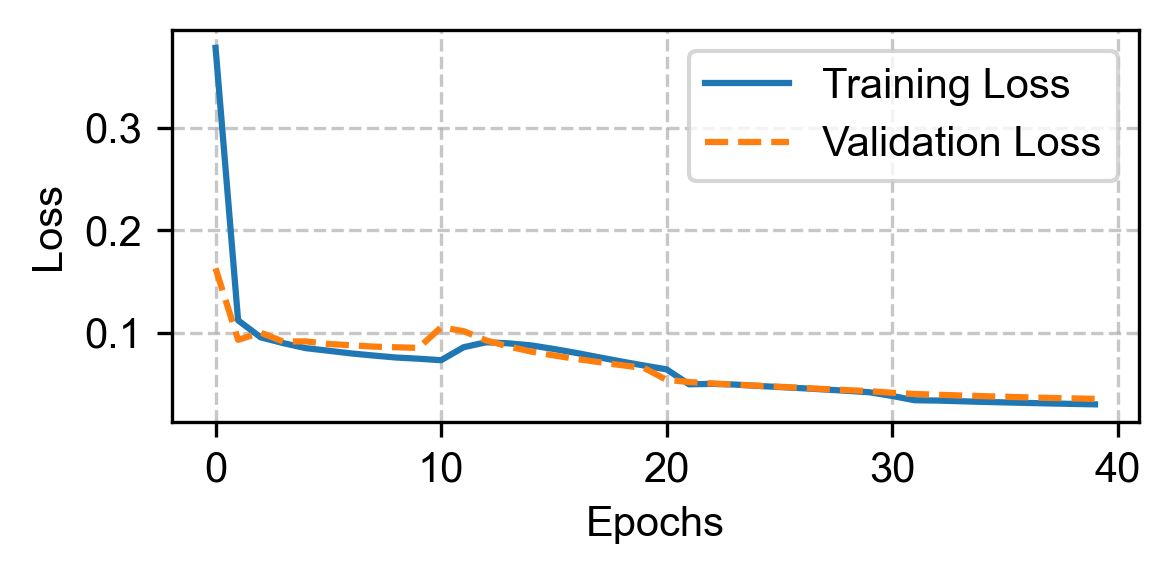 |
| --- |
| **Figure S1. Epoch-loss plot** |

| 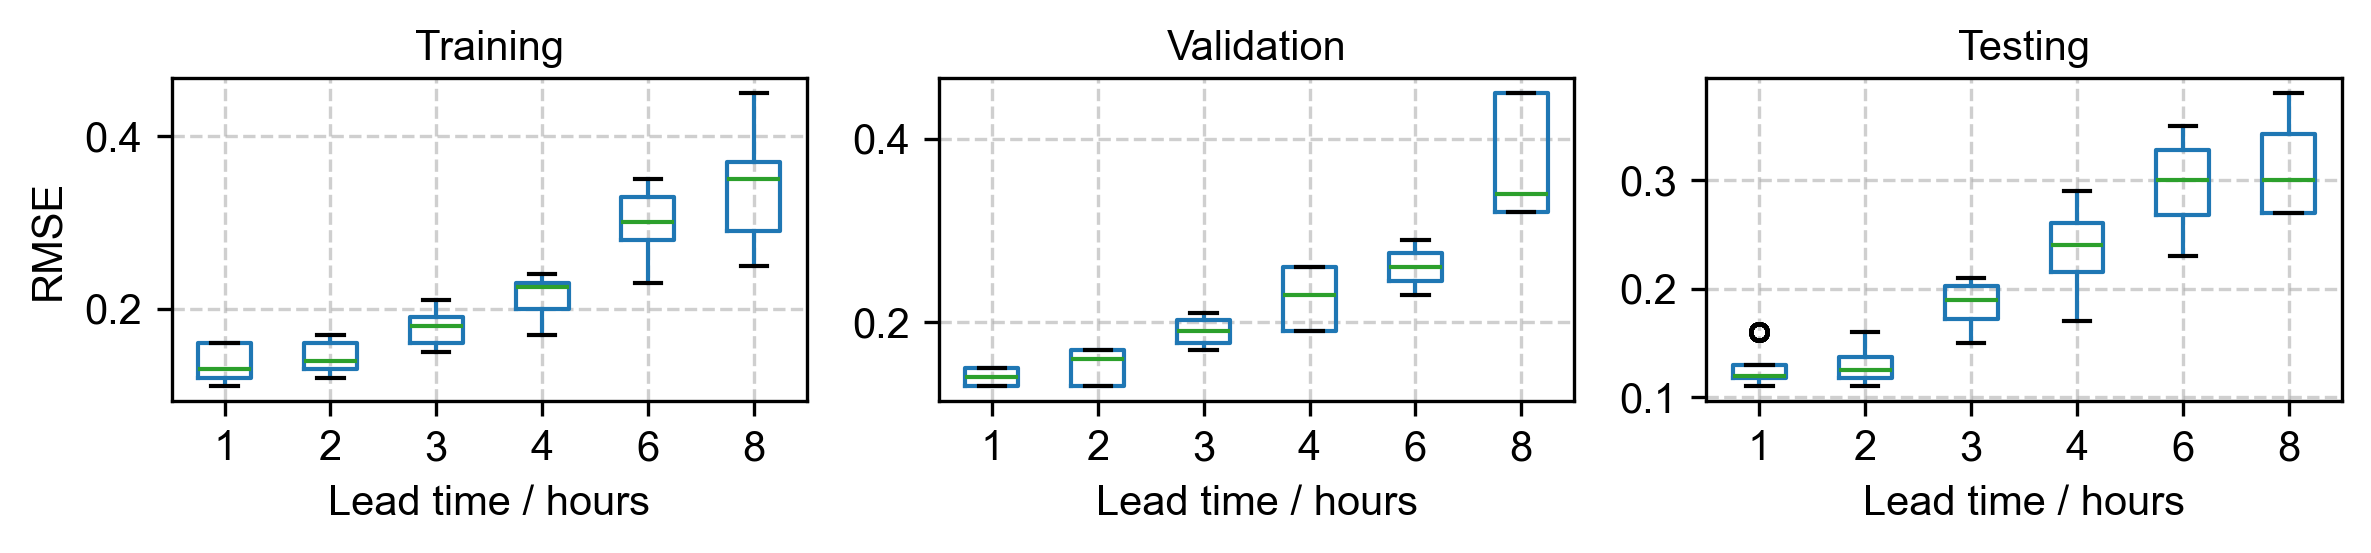 |
| --- |
| **a) Scenario 1** |
| 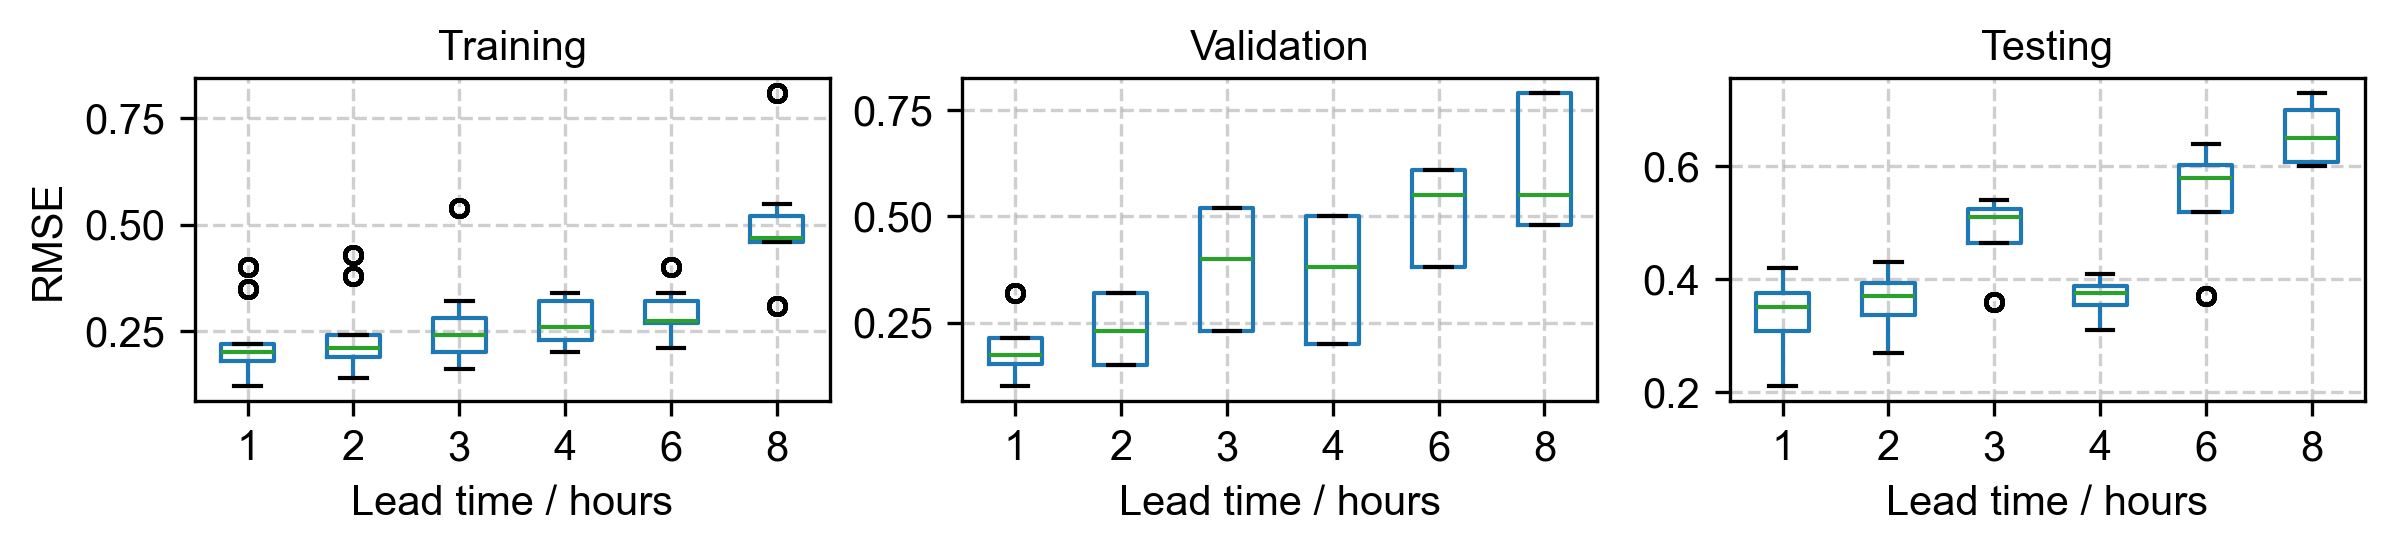 |
| **b) Scenario 2** |
| 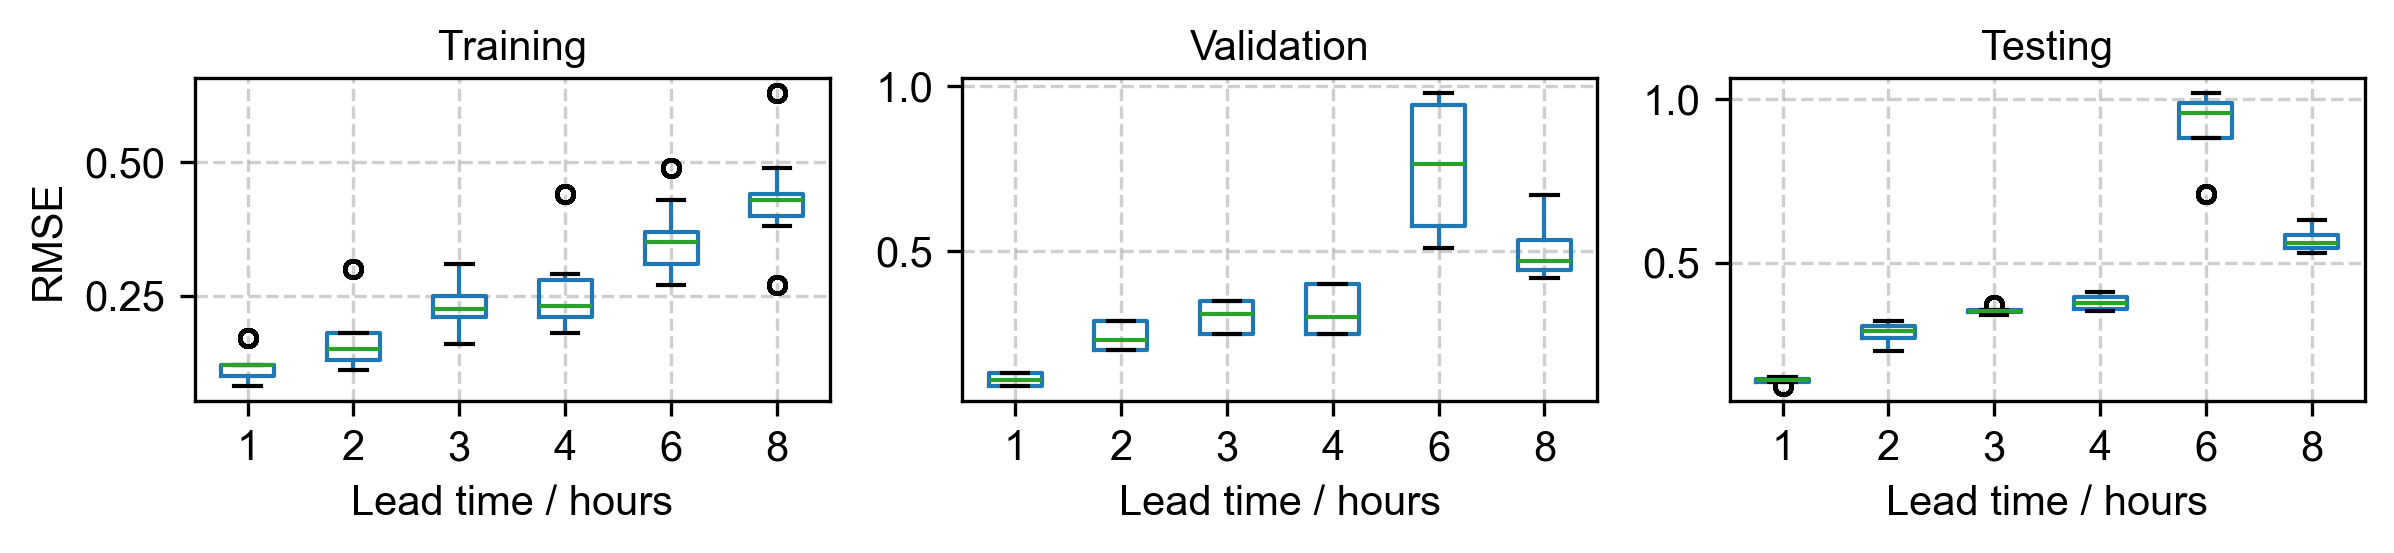 |
| **c) Scenario 3** |
| **Figure S2. Performance of water stage predictions across lead times of 1, 2, 3, 4, 6, and 8 hours, with a fixed input time step of 10 hours, during the training, validation, and testing stages.** |
